# Supplementary material for: Super tough bilayer actuators based on multi-responsive hydrogels crosslinked by functional triblock copolymer micelle macro-crosslinkers
Source: Royal Society of Chemistry journal article supplement (doi:10.1039/c9tb00249a), 2019-01-01
Supplement: c9tb00249a1.pdf [file c9tb00249a1.pdf]

## Supporting Information

### Super Tough Bilayer Actuators Based on Multi-Responsive Hydrogels

#### Crosslinked by Functional Triblock Copolymer Micelle Macro-Crosslinkers

Peng Sun,<sup>a,b</sup> Hua Zhang,<sup>b</sup> Dan Xu,<sup>b</sup> Zhenwu Wang,<sup>b</sup> Liufang Wang,<sup>b</sup> Guorong Gao,<sup>b</sup>

Gaffar Hossain,<sup>c</sup> Jiangyu Wu,<sup>\*a</sup> Rong Wang,<sup>\*b</sup> and Jun Fu<sup>\*b</sup>

a. School of Materials Science and Engineering, Wuhan Institute of Technology, 206

Guanggu No. 1 Road, Wuhan 430205, China.

b. Cixi Institute of Biomedical Engineering & Polymers and Composites Division,

Ningbo Institute of Materials Technology & Engineering, Chinese Academy of

Sciences, 1219 Zhongguan West Road, Ningbo 315201, China.

c. V-Trion GmbH, Schwelbadstr. 2, A-6845 Hohenems, Austria.

E-mail: [wujiangyu@wit.edu.cn](mailto:wujiangyu@wit.edu.cn) (Prof. JY Wu), [rong.wang@nimte.ac.cn](mailto:rong.wang@nimte.ac.cn) (Dr. R Wang),

[fujun@nimte.ac.cn](mailto:fujun@nimte.ac.cn) (Prof. J Fu)

## Characterization of F127DA

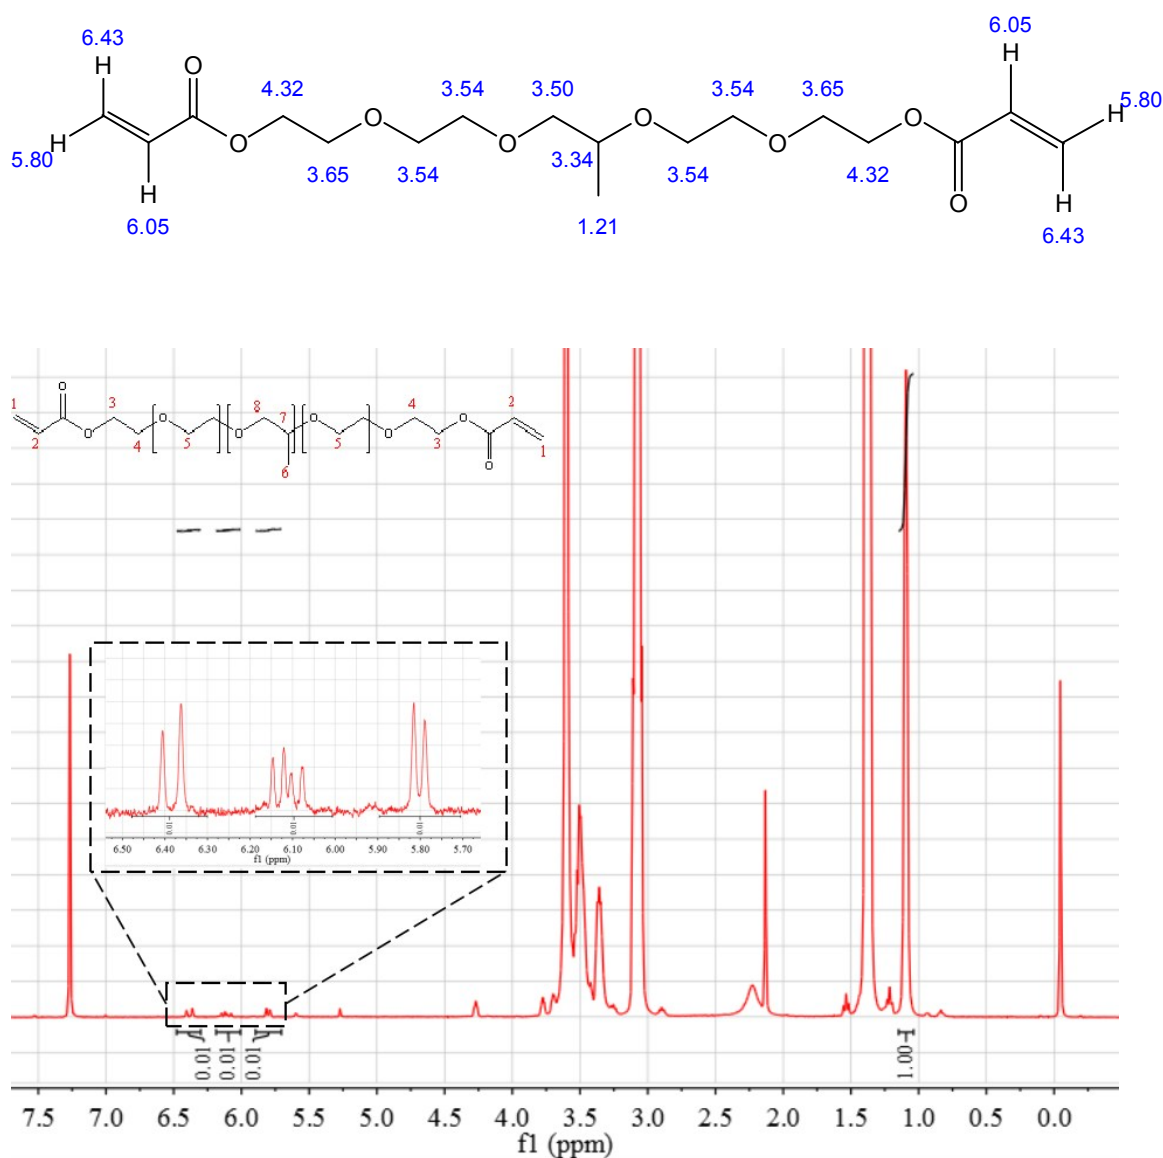

Figure S1. Structure of F127DA and its  $^1\text{H}$  NMR spectrum.

Figure S1 shows the  $^1\text{H}$  NMR spectrum of the synthesized F127DA. The peak of 1.21 ppm is attributed to the proton of  $-\text{CH}_3$  at the PPO unit, and the peaks of 5.8-6.4 ppm are attributed to the proton of  $-\text{CH}=\text{CH}_2$  in the acryl unit. The ratio of the relative peak areas of 5.8-6.4 ppm to 1.1 ppm in  $^1\text{H}$  NMR spectrum is 0.03. The theoretical value of the fully acrylated F127DA molecule is 1/32.5. Therefore, the conversion ratio of F127 to F127DA is 97.5% by calculating the ratio of the actual value to the

theoretical value.

### Formulations for Hydrogel Preparation

Table S1 Contents of monomers used for preparation of different hydrogel samples

| Sample                          | NIPAM<br>(mol/L) | AAm<br>(mol/L) | F127DA<br>(mol/L)  | KPS<br>(mg) | TEMED<br>( $\mu$ L) | Deionized water<br>(ml) |
|---------------------------------|------------------|----------------|--------------------|-------------|---------------------|-------------------------|
| N <sub>2</sub>                  | 2                | 0              | $6 \times 10^{-3}$ | 10          | 10                  | 5                       |
| N <sub>4</sub>                  | 4                | 0              | $6 \times 10^{-3}$ | 10          | 10                  | 5                       |
| N <sub>6</sub>                  | 6                | 0              | $6 \times 10^{-3}$ | 10          | 10                  | 5                       |
| N <sub>8</sub>                  | 8                | 0              | $6 \times 10^{-3}$ | 10          | 10                  | 5                       |
| N <sub>10</sub>                 | 10               | 0              | $6 \times 10^{-3}$ | 10          | 10                  | 5                       |
| N <sub>2</sub> A <sub>0.4</sub> | 2                | 0.4            | $6 \times 10^{-3}$ | 10          | 10                  | 5                       |
| N <sub>2</sub> A <sub>2</sub>   | 2                | 2              | $6 \times 10^{-3}$ | 10          | 10                  | 5                       |
| N <sub>2</sub> A <sub>10</sub>  | 2                | 10             | $6 \times 10^{-3}$ | 10          | 10                  | 5                       |
| N <sub>2</sub> A <sub>20</sub>  | 2                | 20             | $6 \times 10^{-3}$ | 10          | 10                  | 5                       |
| N <sub>4</sub> A <sub>4</sub>   | 4                | 4              | $6 \times 10^{-3}$ | 10          | 10                  | 5                       |
| N <sub>6</sub> A <sub>6</sub>   | 6                | 6              | $6 \times 10^{-3}$ | 10          | 10                  | 5                       |
| N <sub>8</sub> A <sub>8</sub>   | 8                | 8              | $6 \times 10^{-3}$ | 10          | 10                  | 5                       |
| N <sub>10</sub> A <sub>10</sub> | 10               | 10             | $6 \times 10^{-3}$ | 10          | 10                  | 5                       |
